# Supplementary material
Source: PubMed Central journal article supplement (PMC7519925)
Supplement: 420_2020_1543_MOESM1_ESM.pdf [file 420_2020_1543_MOESM1_ESM.pdf]

## **Supplementary material to**

Felix Martin Hofmann <sup>(1,2)</sup>, Edward Olawumi <sup>(1)</sup>, Martina Michaelis<sup>(1)</sup>, Ulrich Stößel <sup>(1)</sup>, Friedrich Hofmann † <sup>(1)</sup>

## **Significance of norovirus in occupational health: A review of published norovirus outbreaks in Central and Northern Europe**

International Archives of Occupational and Environmental Health

<sup>(1)</sup> Research Centre for Occupational and Social Medicine (FFAS), Freiburg, Germany

<sup>(2)</sup> Institute of Earth and Environmental Sciences, University of Freiburg, Germany

### **Corresponding author**

Felix Martin Hofmann

Research Centre for Occupational and Social Medicine (FFAS)

Bertoldstraße 63

D-79098 Freiburg, Germany

Phone +49 761 82526

E-mail: mahofmann@ffas.de

ORCID: 0000-0002-9882-2613

## **Systematic search for articles on norovirus outbreaks in Central and Northern Europe**

### **EMBASE**

Search performed on the 14<sup>th</sup> of November 2016

1. "Noro\*" (English keyword): 51632 articles
2. "Norwalk\*" (English keyword): 5553 articles
3. 1 OR 2: 51632 articles
4. "Outbreak\*" (English keyword): 2170 articles
5. "Epidemic\*" (English keyword): 278838 articles
6. "Pandemic\*" (English keyword): 42420 articles
7. "Disease Outbreak\*" (English keyword): 86151 articles
8. 4 OR 5 OR 6 OR 7: 291968 articles
9. 3 AND 8: 2651 articles
10. "Personnel" (text word): 367078 articles
11. "Occupational" (text word): 422557 articles
12. "Staff" (text word): 228221 articles
13. „Employee\*“ (text word): 47359 articles
14. „Worker\*“ (text word): 200973 articles
15. „Health personnel“ (text word): 71345 articles
16. 10 OR 11 OR 12 OR 13 OR 14 OR 15: 1010504 articles
17. 9 AND 16: 320 articles
18. 17 AND AND PY=2000 to 2016 AND LA=(ENGLISH; GERMAN; FRENCH): 284 articles
19. 19 NOT SU=MEDLINE (exclude articles which are listed in MEDLINE): 220 articles

### **Global Health**

Search performed on the 15<sup>th</sup> of November 2016

1. "Noro\*" (English keyword): 2996 articles
2. "Norwalk\*" (English keyword): 3365 articles

3. 1 OR 2: 3384 articles
4. "Outbreak\*" (English keyword): 26705 articles
5. "Epidemic\*" (English keyword): 19030 articles
6. "Pandemic\*" (English keyword): 1796 articles
7. "Disease Outbreak\*" (English keyword): 15 articles
8. 4 OR 5 OR 6 OR 7: 42649 articles
9. 3 AND 8: 1374 articles
10. "Personnel" (text word): 22661 articles
11. "Occupational" (text word): 52094 articles
12. "Staff" (text word): 25958 articles
13. „Employee\*" (text word): 11893 articles
14. „Worker\*" (text word): 69129 articles
15. „Health personnel" (text word): 1263 articles
16. 10 OR 11 OR 12 OR 13 OR 14 OR 15: 124171 articles
17. 9 AND 16: 222 articles
18. 17 AND AND PY=2000 to 2016 AND LA=(ENGLISH; GERMAN; FRENCH): 190 articles

## **GMS**

Search performed on the 13<sup>th</sup> of November 2016

1. "Noro\*" (text word): 13 articles
2. "Norwalk" (text word): 2 articles
3. 1 OR 2: 14 articles
4. "Outbreak\*" (text word): 50 articles
5. "Epidemic\*" (text word): 35 articles
6. "Pandemic\*" (text word): 6 articles
7. "Disease Outbreak\*" (text word): 2 articles
8. 4 OR 5 OR 6 OR 7: 75 articles
9. 8 AND LA=(ENGLISH; GERMAN; FRENCH): 5 articles

10. 9 AND PY=2000 to 2016: 5 articles

### **GMS meetings**

Search performed on the 13<sup>th</sup> of November 2016

1. "Noro\*" (text word): 10 articles
2. "Norwalk" (text word): 2 articles
3. 1 OR 2: 11 articles
4. "Outbreak\*" (text word): 43 articles
5. "Epidemic\*" (text word): 53 articles
6. "Pandemic\*" (text word): 10 articles
7. "Disease Outbreak\*" (text word): 0 articles
8. 4 OR 5 OR 6 OR 7: 93 articles
9. 3 AND 8: 1 article

### **PUBMED**

Search carried out on the 17<sup>th</sup> of October 2016

1. "Noro\*" (MeSH terms): 3549 articles
2. "Norwalk virus" (MeSH terms): 679 articles
3. 1 OR 2: 3549 articles
4. "Outbreak\*" (text word): 104085 articles
5. "Epidemic\*" (text word): 84811 articles
6. "Pandemic\*" (text word): 20435 articles
7. "Disease outbreak\*" (text word): 71231 articles
8. 4 AND 5 AND 6 AND 7: 179673 articles
9. 3 AND 8: 1717 articles
10. "french" (language) OR "german" (language) OR "english" (language): 23498916 articles
11. 9 AND 10: 1577 articles

12. 11 AND "2000/01/01" (date - publication): "3000" (date - publication): 1366 articles
13. "personnel" (text word): 298546 articles
14. "occupational" (text word): 244747 articles
15. "staff" (text word): 197535 articles
16. "employee\*" (text word): 53030 articles
17. "worker\*" (text word): 157446 articles
18. "Health personnel" (MeSH term): 424846 articles
19. 13 OR 14 OR 15 OR 16 OR 17 OR 18: 988212 articles
20. 12 AND 19: 186 articles

### **Outbreak Database**

Search performed on the 11<sup>th</sup> of October 2016

GE="Norovirus" (GE: microorganism, genus) AND RY:[2000 TO 2147483647] (RY: publication year) AND NOC="Personnel" (group that suffered from the outbreak) AND (FY="Inpatient care (not ICU)" OR FY="Intensive care unit" OR FY="Nursing home") (FY: facility): 37 results

Online Resource 1: Epidemiological data for NoV outbreaks in health care facilities

| Authors/year of publ.        | Study type <sub>1</sub> | Country <sub>2</sub> | Setting         | Transmission path <sub>3</sub> | Genogroup (GG) | Genotype           | Collectives infected | Outbreak year(s) | Outbreak(s) [n] | Subjects with symptoms [n] | Employees affected [n] | Subjects (non-staff with symptoms) [n] | Ratio symptomatic employees: symptomatic persons (total) | Remarks |
|------------------------------|-------------------------|----------------------|-----------------|--------------------------------|----------------|--------------------|----------------------|------------------|-----------------|----------------------------|------------------------|----------------------------------------|----------------------------------------------------------|---------|
| Cummins and Ready (2016)     | AggDat                  | GB                   | Hospitals (n=4) | (---) <sub>4</sub>             | GGI & GGII     | (---)              | Patients & HCWs      | 2015             | 2               | 4                          | 0                      | 4                                      | 0.00                                                     |         |
|                              |                         |                      |                 |                                | GGII           |                    |                      |                  | 1               | 3                          | 0                      | 3                                      | 0.00                                                     |         |
|                              |                         |                      |                 |                                | GGII           |                    |                      |                  | 16              | 51                         | 7                      | 44                                     | 0.14                                                     |         |
|                              |                         |                      |                 |                                | GGII           |                    |                      |                  | 1               | 6                          | 0                      | 6                                      | 0.00                                                     |         |
| Danial et al. (2016)         | OutB                    | GB                   | Hospital        | (---)                          | GGII           | GGII.4 Sydney 2012 | Patients & HCWs      | 2013             | 1               | 173                        | 30                     | 143                                    | 0.17                                                     |         |
| Harris (2016)                | AggDat                  | GB                   | Hospitals (n=?) | (---)                          | (---)          | (---)              | Patients & HCWs      | 2009 - 2016      | 5160            | 91814                      | 18685                  | 73129                                  | 0.20                                                     |         |
| Schulz-Stübner et al. (2016) | OutB+                   | DE                   | Hospitals (n=?) | EC, p2p                        | (---)          | (---)              | Patients & HCWs      | 2013-2015        | 1               | 11                         | 6                      | 5                                      | 0.55                                                     |         |
|                              |                         |                      |                 |                                |                |                    |                      |                  | 1               | 100                        | 34                     | 66                                     | 0.34                                                     |         |
|                              |                         |                      |                 |                                |                |                    |                      |                  | 1               | 10                         | 3                      | 7                                      | 0.30                                                     |         |
|                              |                         |                      |                 |                                |                |                    |                      |                  | 1               | 7                          | 4                      | 3                                      | 0.57                                                     |         |
|                              |                         |                      |                 |                                |                |                    |                      |                  | 1               | 13                         | 2                      | 11                                     | 0.15                                                     |         |
|                              |                         |                      |                 |                                |                |                    |                      |                  | 1               | 10                         | 6                      | 4                                      | 0.60                                                     |         |
|                              |                         |                      |                 |                                |                |                    |                      |                  | 1               | 10                         | 4                      | 6                                      | 0.40                                                     |         |
|                              |                         |                      |                 |                                |                |                    |                      |                  | 1               | 11                         | 2                      | 9                                      | 0.18                                                     |         |
|                              |                         |                      |                 |                                |                |                    |                      |                  | 1               | 12                         | 3                      | 9                                      | 0.25                                                     |         |

| Authors/year of publ.  | Study type <sub>1</sub> | Country <sub>2</sub> | Setting         | Transmission path <sub>3</sub> | Genogroup (GG) | Genotype | Collectives infected | Outbreak year(s) | Outbreak(s) [n] | Subjects with symptoms [n] | Employees affected [n] | Subjects (non-staff with symptoms) [n] | Ratio symptomatic employees: symptomatic persons (total) | Remarks |
|------------------------|-------------------------|----------------------|-----------------|--------------------------------|----------------|----------|----------------------|------------------|-----------------|----------------------------|------------------------|----------------------------------------|----------------------------------------------------------|---------|
| Mattner et al. (2015)  | AggDat                  | DE                   | Hospitals (n=5) | EC, p2p                        | (---)          | (---)    | Patients & HCWs      | 2002/2003        | 5               | 130                        | 46                     | 84                                     | 0.35                                                     |         |
|                        |                         |                      |                 |                                |                |          |                      | 2002/2003        | 13              | 382                        | 83                     | 299                                    | 0.22                                                     |         |
|                        |                         |                      |                 |                                |                |          |                      | 2007-2009        | 24              | 442                        | 129                    | 313                                    | 0.29                                                     |         |
|                        |                         |                      |                 |                                |                |          |                      | 2010-2012        | 11              | 181                        | 36                     | 145                                    | 0.20                                                     |         |
|                        |                         |                      |                 |                                |                |          |                      | 2010-2012        | 18              | 297                        | 54                     | 243                                    | 0.18                                                     |         |
| Mitchell et al. (2015) | AggDat                  | GB                   | Hospitals (n=5) | (---)                          | (---)          | (---)    | Patients & HCWs      | 2007/2008        | 59              | 694                        | 87                     | 607                                    | 0.13                                                     |         |
|                        |                         |                      |                 |                                |                |          |                      | 2008/2009        | 31              | 324                        | 40                     | 282                                    | 0.12                                                     |         |
|                        |                         |                      |                 |                                |                |          |                      | 2009/2010        | 21              | 272                        | 54                     | 218                                    | 0.20                                                     |         |
|                        |                         |                      |                 |                                |                |          |                      | 2010/2011        | 3               | 43                         | 20                     | 23                                     | 0.47                                                     |         |
|                        |                         |                      |                 |                                |                |          |                      | 2011/2012        | 2               | 32                         | 11                     | 21                                     | 0.34                                                     |         |
|                        |                         |                      |                 |                                |                |          |                      | 2012/2013        | 2               | 25                         | 8                      | 17                                     | 0.32                                                     |         |
|                        |                         |                      |                 |                                |                |          |                      | 2013/2014        | 1               | 10                         | 1                      | 9                                      | 0.10                                                     |         |

| Authors/year of publ.             | Study type <sub>1</sub> | Country <sub>2</sub> | Setting                                      | Transmission path <sub>3</sub> | Genogroup (GG) | Genotype                            | Collectives infected | Outbreak year(s) | Outbreak(s) [n] | Subjects with symptoms [n] | Employees affected [n] | Subjects (non-staff with symptoms) [n] | Ratio symptomatic employees: symptomatic persons (total) | Remarks |
|-----------------------------------|-------------------------|----------------------|----------------------------------------------|--------------------------------|----------------|-------------------------------------|----------------------|------------------|-----------------|----------------------------|------------------------|----------------------------------------|----------------------------------------------------------|---------|
| Rahamat-Langendoen et al. (2013)- | OutB                    | NL                   | Hospital                                     | (---)                          | GGII           | GGII.4 2009, GGII.b, GGII.7, GGII.2 | Patients & HCWs      | (---)            | 1               | 9                          | 2                      | 7                                      | 0.22                                                     |         |
| Sauvan et al. (2013)              | OutB                    | CH                   | Hospital                                     | (---)                          | (---)          | (---)                               | Patients & HCWs      | 2012-2013        | 1               | 163                        | 33                     | 130                                    | 0.20                                                     |         |
| Heijne et al. (2012)              | OutB                    | NL                   | Psychiatric institution                      | p2p                            | (---)          | (---)                               | Patients & HCWs      | 2008             | 1               | 46                         | 13                     | 33                                     | 0.28                                                     |         |
| Sukhrie et al. (2012)             | OutB+                   | NL                   | Hospitals (n=3)                              | (---)                          | GGII           | GGII.4-2008/GGII.4.-2006b           | Patients & HCWs      | 2009             | 1               | 16                         | 11                     | 5                                      | 0.69                                                     |         |
|                                   |                         |                      |                                              |                                |                | GGII.2                              |                      | 2009             | 1               | 6                          | 0                      | 6                                      | 0.00                                                     |         |
|                                   |                         |                      |                                              |                                |                | GGII.7                              |                      | 2009             | 1               | 8                          | 7                      | 1                                      | 0.88                                                     |         |
| Carpentier et al. (2011)          | OutB                    | FR                   | Hospital                                     | (---)                          | GGII           | GGII.4                              | Patients & HCWs      | 2008             | 1               | 150                        | 43                     | 107                                    | 0.29                                                     |         |
| Danial et al. (2011)              | AggDat                  | GB                   | Hospitals (n=?)                              | (---)                          | (---)          | (---)                               | Patients & HCWs      | 2007-2009        | 142             | 2317                       | 599                    | 1718                                   | 0.26                                                     |         |
| Hauri et al. (2011)               | AggDat                  | DE                   | Hospitals (n=?)/rehabilitation centers (n=?) | (---)                          | (---)          | (---)                               | Patients & HCWs      | 2007             | 155             | 3381                       | 660                    | 2721                                   | 0.20                                                     |         |
| Illingworth et al. (2011)         | AggDat                  | GB                   | Hospital and community                       | (---)                          | (---)          | (---)                               | Patients & HCWs      | 2009/2010        | 24              | 318                        | 60                     | 258                                    | 0.19                                                     | [1]     |



| Authors/year of publ.     | Study type <sub>1</sub> | Country <sub>2</sub> | Setting                                                              | Transmission path <sub>3</sub> | Genogroup (GG) | Genotype       | Collectives infected     | Outbreak year(s) | Outbreak(s) [n] | Subjects with symptoms [n] | Employees affected [n] | Subjects (non-staff with symptoms) [n] | Ratio symptomatic employees: symptomatic persons (total) | Remarks |
|---------------------------|-------------------------|----------------------|----------------------------------------------------------------------|--------------------------------|----------------|----------------|--------------------------|------------------|-----------------|----------------------------|------------------------|----------------------------------------|----------------------------------------------------------|---------|
| Schmid et al. (2011)      | OutB                    | AT                   | Hospital with affiliated rehabilitation center and convalescent home | Food, p2p, EC                  | GGII           | GGII.4 2006b   | Patients & HCWs          | 2009             | 1               | 204                        | 52                     | 152                                    | 0.25                                                     |         |
| Schwartz et al. (2011)    | OutB                    | DE                   | Hospital                                                             | p2p                            | GGII           | GGII.4         | Patients & HCWs          | (---)            | 1               | 37                         | 11                     | 26                                     | 0.30                                                     |         |
| Aziz (2010)               | AggDat                  | GB                   | Hospitals (n=?)                                                      | (---)                          | (---)          | (---)          | Patients & HCWs          | 2009             | 458             | 5746                       | 1265                   | 4481                                   | 0.22                                                     |         |
| Fretz et al. (2009)       | OutB                    | AT                   | Hospital                                                             | p2p, EC                        | GGII           | GGII.4 2006b   | Patients & HCWs          | 2006/2007        | 1               | 70                         | 14                     | 56                                     | 0.20                                                     |         |
| Kanerva et al. (2009)     | OutB                    | FI                   | Hospital                                                             | p2p                            | GGII           | GGII.4 2006b   | Patients & HCWs          | 2006             | 1               | 445                        | 205                    | 240                                    | 0.46                                                     |         |
| Sommer et al. (2009)      | OutB+                   | AT                   | Hospitals (n=2)                                                      | (---)                          | (---)          | (---)          | Patients (infants) & HCW | 2007/2008        | 1               | 2                          | 1                      | 1                                      | 0.50                                                     |         |
|                           |                         |                      |                                                                      |                                | GGII           |                |                          |                  | 1               | 5                          | 0                      | 5                                      | 0.00                                                     |         |
| Leuenberger et al. (2007) | OutB                    | CH                   | Hospital                                                             | p2p, EC                        | GGII           | GGII.4         | Patients & HCWs          | 2003             | 1               | 77                         | 28                     | 49                                     | 0.36                                                     |         |
| Vardy et al. (2007)       | OutB                    | GB                   | Hospital                                                             | (---)                          | (---)          | (---)          | HCWs                     | 2006             | 1               | 37                         | 37                     | 0                                      | 1.00                                                     |         |
| Mattner et al. (2006)     | OutB                    | DE                   | Hospital                                                             | p2p                            | GGII           | GGII.4 Grimsby | Patients & HCWs          | 2002             | 1               | 163                        | 79                     | 84                                     | 0.48                                                     |         |

| Authors/year of publ.   | Study type <sub>1</sub> | Country <sub>2</sub> | Setting                              | Transmission path <sub>3</sub> | Genogroup (GG) | Genotype                                                           | Collectives infected           | Outbreak year(s) | Outbreak(s) [n] | Subjects with symptoms [n] | Employees affected [n] | Subjects (non-staff with symptoms) [n] | Ratio symptomatic employees: symptomatic persons (total) | Remarks |
|-------------------------|-------------------------|----------------------|--------------------------------------|--------------------------------|----------------|--------------------------------------------------------------------|--------------------------------|------------------|-----------------|----------------------------|------------------------|----------------------------------------|----------------------------------------------------------|---------|
| Simon et al. (2006)     | OutB                    | DE                   | Hospital                             | (---)                          | (---)          | (---)                                                              | Patients and relatives thereof | 2004             | 1               | 13                         | 0                      | 13                                     | 0.00                                                     |         |
| Fretz et al. (2005)     | OutB+                   | CH                   | Hospital and affiliated nursing home | p2p, food                      | GGII           | GGII.4 Miami Beach                                                 | Patients & HCWs                | 2003             | 1               | 140                        | 78                     | 62                                     | 0.56                                                     |         |
| Odelin et al. (2005)    | OutB                    | FR                   | Hospital                             | p2p                            | GGII           | GGII.4 Lordsdale                                                   | Patients & HCWs                | 2002             | 1               | 110                        | 40                     | 70                                     | 0.36                                                     |         |
| Schmid et al. (2005)    | OutB+                   | AT                   | Hospital and nursing home            | p2p, EC                        | GGII           | GGII.4 (Jamboree like)                                             | Patients & HCW s               | 2004             | 1               | 53                         | 25                     | 28                                     | 0.47                                                     |         |
| Zingg et al. (2005)     | OutB                    | CH                   | Hospital                             | (---)                          | (---)          | (---)                                                              | Patients & HCWs                | 2003             | 1               | 45                         | 29                     | 16                                     | 0.64                                                     |         |
| Baum von et al. (2004)  | OutB                    | DE                   | Hospital                             | (---)                          | (---)          | (---)                                                              | Patients & HCWs                | 2004             | 1               | 16                         | 12                     | 4                                      | 0.75                                                     |         |
| Gallimore et al. (2004) | OutB                    | GB                   | Hospital                             | (---)                          | GGI, GGII      | GGI.h Potsdam, GGII.3a Harrow/Mexico, GGII.7 Leeds, GGII.4 Grimsby | Patients & HCWs                | 2002             | 1               | 99                         | 59                     | 40                                     | 0.60                                                     |         |
| Lopman et al. (2004)    | AggDat                  | GB                   | Hospitals (n=15)                     | (---)                          | (---)          | (---)                                                              | Patients & HCWs                | 2002/2003        | 61              | 1212                       | 482                    | 730                                    | 0.40                                                     |         |
| Jansen et al. (2004)    | OutB                    | DE                   | Hospital and nursing home            | p2p , EC, aer                  | GGII           | GGII.4 Grimsby-like                                                | Patients & HCWs                | 2002/2003        | 1               | 322                        | 137                    | 185                                    | 0.43                                                     | [2]     |
| Meyer et al. (2004)     | OutB                    | DE                   | Hospital                             | (---)                          | (---)          | (---)                                                              | Patients & HCWs                | 2002             | 2               | 95                         | 67                     | 28                                     | 0.71                                                     |         |

| Authors/year of publ.   | Study type <sub>1</sub> | Country <sub>2</sub> | Setting               | Transmission path <sub>3</sub> | Genogroup (GG) | Genotype                                      | Collectives infected                                                              | Outbreak year(s) | Outbreak(s) [n] | Subjects with symptoms [n] | Employees affected [n] | Subjects (non-staff with symptoms) [n] | Ratio symptomatic employees: symptomatic persons (total) | Remarks |
|-------------------------|-------------------------|----------------------|-----------------------|--------------------------------|----------------|-----------------------------------------------|-----------------------------------------------------------------------------------|------------------|-----------------|----------------------------|------------------------|----------------------------------------|----------------------------------------------------------|---------|
| Verbelen et al. (2004)  | OutB                    | BE                   | Hospital              | (---)                          | GGII           | GGII.4 Camberwell                             | Patients & HCWs                                                                   | 2002             | 1               | 31                         | 11                     | 20                                     | 0.35                                                     |         |
| Khanna et al. (2003)    | OutB                    | CH                   | Hospital              | p2p                            | GGII           | GGII._ Basel                                  | Patients & HCW s                                                                  | 2001             | 1               | 63                         | 36                     | 27                                     | 0.57                                                     |         |
| Billgren et al. (2002)  | AggDat                  | SE                   | Hospitals (n=10)      | aer, p2p, EC                   | GGI, GGII      | GGI.2 Hawaii, GGII.3 Mexico, GGII.4 Lordsdale | Patients & HCWs                                                                   | 1996             | 54              | 794                        | 237                    | 557                                    | 0.30                                                     |         |
| Kuusi et al. (2002)     | OutB                    | FI                   | Rehabilitation center | p2p                            | GGII           | (---)                                         | Patients, HCWs, administrative staff, kitchen, cleaning staff & maintenance staff | 1999/2000        | 1               | 331                        | 118                    | 213                                    | 0.36                                                     |         |
| O'Neill et al. (2001)   | OutB+                   | GB                   | Hospital              | (---)                          | (---)          | (---)                                         | Patients & HCWs                                                                   | 1999             | 1               | 30                         | 9                      | 21                                     | 0.30                                                     |         |
| Oppermann et al. (2001) | OutB                    | DE                   | Hospital              | p2p                            | (---)          | (---)                                         | Patients & HCWs                                                                   | 1999             | 1               | 83                         | 11                     | 72                                     | 0.13                                                     |         |
| Cunney et al. (2000)    | OutB                    | IE                   | Hospital              | p2p,food,aer                   | (---)          | (---)                                         | Patients, HCWs & food handlers                                                    | 1993             | 1               | 95                         | 48                     | 47                                     | 0.51                                                     |         |

#### Legend

<sup>1</sup>Study type: Aggregated data of diverse NoV outbreaks (aggDat), outbreak case study (OutB), outbreak case studies, i.e. more than one NoV outbreak that are separately reported in a publication (OutB+)

<sup>2</sup>Country according to ISO 3166-1: Austria (AT), Belgium (BE), Germany (DE), Finland (FI), France (FR), United Kingdom (GB), Ireland (IE), the Netherlands (NL), Norway (NO), Sweden (SE)

<sup>3</sup>Transmission path: aerosol (aer), environmental contamination (EC), person-to-person (p2p)

<sup>4</sup>Not specified

[1] Fragmentary data for the 2007/2008 season, therefore excluded; [2] only data available for one nursing home/ hospital outbreak

Online Resource 2: Epidemiological data for NoV outbreaks in community facilities

| Authors/year of publ.  | Study type <sub>1</sub> | Country <sub>2</sub> | Setting                                 | Transmission path <sub>3</sub> | Genogroup          | Genotype                                                                                                              | Collectives infected | Outbreak year(s) | Outbreak(s) [n] | Subjects with symptoms [n] | Employees affected [n] | Subjects (non-staff with symptoms) [n] | Ratio symptomatic employees: symptomatic persons (total) | Remarks |
|------------------------|-------------------------|----------------------|-----------------------------------------|--------------------------------|--------------------|-----------------------------------------------------------------------------------------------------------------------|----------------------|------------------|-----------------|----------------------------|------------------------|----------------------------------------|----------------------------------------------------------|---------|
| Loury et al. (2015)    | OutB                    | FR                   | Nursing home                            | Food                           | GGII               | GGII.g/GGII.1, GGII.7                                                                                                 | Residents & HCWs     | 2012             | 1               | 84                         | 31                     | 53                                     | 0.37                                                     |         |
| Teunis et al. (2015)   | OutB+                   | NL                   | Nursing home                            | ?                              | (---) <sub>4</sub> | (---)                                                                                                                 | Residents & HCWs     | 2009-2012        | 1               | 19                         | 11                     | 8                                      | 0.58                                                     | [1]     |
| Jian et al. (2012)     | OutB                    | AT                   | School                                  | Food, p2p                      | GGII               | GGII.6/GGII.7 Hybrid                                                                                                  | Students             | 2011             | 1               | 48                         | 0                      | 48                                     | 0.00                                                     |         |
| Sukhrie et al. (2012)  | OutB+                   | NL                   | Nursing home                            | (---)                          | GGII               | GGII.4 2010                                                                                                           | Residents & HCWs     | 2009             | 1               | 18                         | 11                     | 7                                      | 0.61                                                     | [2]     |
|                        |                         |                      |                                         |                                |                    |                                                                                                                       |                      | 2009             | 1               | 17                         | 8                      | 9                                      | 0.47                                                     |         |
| Vivancos et al. (2010) | AggDat                  | GB                   | Nursing homes & residential homes (n=?) | (---)                          | GGII, GGI (?)      | (---)                                                                                                                 | Residents & HCWs     | 2006-2007        | 96              | 2114                       | 727                    | 1387                                   | 0.34                                                     | [3]     |
| Friesema et al. (2009) | AggDat                  | NL                   | Nursing homes (n=49)                    | (---)                          | GGI, GGII          | GGII.4 2004, GGII.4 2006a, GGII2006b, GGI.3 Birmingham, GGI.6 Mikkeli, GGII.b Hilversum, GGII.3 Toronto, GGII.7 Leeds | Residents & HCWs     | 2005-2007        | 26              | 1027                       | 390                    | 637                                    | 0.38                                                     |         |
| Adams (2008)           | OutB                    | DE                   | Nursing home                            | (---)                          | (---)              | (---)                                                                                                                 | Residents & HCWs     | 2007             | 1               | 50                         | 15                     | 35                                     | 0.30                                                     |         |
| Kaynak et al. (2007)   | OutB                    | DE                   | Nursing home                            | (---)                          | (---)              | (---)                                                                                                                 | Residents & HCWs     | 2006             | 1               | 84                         | 19                     | 65                                     | 0.23                                                     |         |

| Authors/year of publ. | Study type <sub>1</sub> | Country <sub>2</sub> | Setting               | Transmission path <sub>3</sub> | Genogroup | Genotype          | Collectives infected  | Outbreak year(s) | Outbreak(s) [n] | Subjects with symptoms [n] | Employees affected [n] | Subjects (non-staff with symptoms) [n] | Ratio symptomatic employees: symptomatic persons (total) | Remarks |
|-----------------------|-------------------------|----------------------|-----------------------|--------------------------------|-----------|-------------------|-----------------------|------------------|-----------------|----------------------------|------------------------|----------------------------------------|----------------------------------------------------------|---------|
| Dreier et al. (2006)  | OutB+                   | DE                   | Nursing home          | p2p                            | GGI       | GGI.4 Chiba       | Residents & HCWs      | 2004             | 1               | 17                         | 5                      | 12                                     | 0.29                                                     |         |
|                       |                         |                      | Nursing home          | p2p                            | GGI       | GGI.4 Chiba       | Residents & HCWs      |                  | 1               | 12                         | 5                      | 7                                      | 0.42                                                     |         |
|                       |                         |                      | Residential home      | p2p                            | GGI       | GGI.2 Southampton | Patients & HCWs       |                  | 1               | 24                         | 6                      | 18                                     | 0.25                                                     |         |
|                       |                         |                      | Residential home      | p2p                            | GGI       | GGI.2 Southampton | Patients & HCWs       |                  | 1               | 22                         | 6                      | 16                                     | 0.27                                                     |         |
|                       |                         |                      | Residential home      | p2p                            | GGI       | GGI.2 Southampton | Patients & HCWs       |                  | 1               | 36                         | 3                      | 33                                     | 0.08                                                     |         |
|                       |                         |                      | Residential home      | p2p                            | GGI       | GGI.2 Southampton | Patients & HCWs       |                  | 1               | 10                         | 2                      | 8                                      | 0.20                                                     |         |
|                       |                         |                      | Residential home      | p2p                            | GGI       | GGI.2 Southampton | Patients & HCWs       |                  | 1               | 40                         | 20                     | 20                                     | 0.50                                                     |         |
| Lopman et al. (2004)  | AggDat                  | GB                   | Nursing homes (n=135) | (---)                          | (---)     | (---)             | Patients & HCWs       | 2002/2003        | 14              | 432                        | 166                    | 266                                    | 0.38                                                     |         |
| O'Neill et al. (2001) | OutB+                   | GB                   | Nursery school        | (---)                          | (---)     | (---)             | Pupils & school staff | (---)            | 1               | 25                         | 2                      | 23                                     | 0.08                                                     |         |
|                       |                         |                      | Nursing home          |                                |           |                   | Residents & HCWs      |                  | 1               | 35                         | 7                      | 28                                     | 0.20                                                     |         |

Legend

<sup>1-4</sup> see supplementary table 1 [1] also asymptomatic subjects tested for NoV, four of five outbreaks in the article were already published in Sukhrie et al. (2012); [2] also asymptomatic subjects tested for NoV; [3] only 34 of 96 gastroenteritis outbreaks are confirmed NoV outbreaks

Online Resource 3: Epidemiological data for NoV outbreaks in hotels, restaurants and canteens

| Authors/year of publ.     | Study type <sub>1</sub> | Country <sub>2</sub> | Setting    | Transmission path <sub>3</sub> | Genogroup | Genotype                       | Collectives infected                                                                      | Outbreak year (s) | Outbreak(s) [n] | Subjects with symptoms [n] | Employees affected [n] | Subjects (non-staff with symptoms) [n] | Ratio symptomatic employees: symptomatic persons (total) | Remarks |
|---------------------------|-------------------------|----------------------|------------|--------------------------------|-----------|--------------------------------|-------------------------------------------------------------------------------------------|-------------------|-----------------|----------------------------|------------------------|----------------------------------------|----------------------------------------------------------|---------|
| Brey (2016)               | OutB                    | DE                   | Restaurant | Food?                          | GGI       | GGI.4                          | Diners & cooks                                                                            | 2016              | 1               | 50                         | 2                      | 48                                     | 0.04                                                     |         |
| Vo et al. (2016)          | OutB                    | FI                   | Restaurant | Food?                          | GGI       | GGI.7                          | Diners & relatives of food handlers                                                       | 2015              | 1               | 15                         | 0                      | 15                                     | 0.00                                                     | [1]     |
| Maritschnik et al. (2013) | OutB                    | AT                   | Hotel      | Food                           | GGII      | GGII.4 Sydney 2012             | Diners & cooks                                                                            | 2012              | 1               | 27                         | 1                      | 26                                     | 0.04                                                     |         |
| Smith et al. (2012)       | OutB                    | GB                   | Restaurant | Food, p2p, EC?                 | GGII      | GGII.2, GGII.3, GGII.4, GGII.6 | Diners, kitchen staff, front of house staff, sommeliers, administrators & kitchen porters | 2009              | 1               | 257                        | 17                     | 240                                    | 0.07                                                     |         |
| Baker et al. (2011)       | OutB                    | GB                   | Restaurant | Food                           | GGI, GGII | (---) <sub>4</sub>             | Diners & kitchen staff                                                                    | 2010              | 1               | 12                         | 1                      | 11                                     | 0.08                                                     |         |

| Authors/year of publ.         | Study type <sub>1</sub> | Country <sub>2</sub> | Setting       | Transmission path <sub>3</sub> | Genogroup | Genotype     | Collectives infected   | Outbreak year(s) | Outbreak(s) [n] | Subjects with symptoms [n] | Employees affected [n] | Subjects (non-staff with symptoms) [n] | Ratio symptomatic employees: symptomatic persons (total) | Remarks |
|-------------------------------|-------------------------|----------------------|---------------|--------------------------------|-----------|--------------|------------------------|------------------|-----------------|----------------------------|------------------------|----------------------------------------|----------------------------------------------------------|---------|
| Guzman-Herrador et al. (2011) | OutB                    | NO                   | Hotel         | Food?                          | (---)     | (---)        | Meeting participants   | 2011             | 1               | 56                         | 0                      | 56                                     | 0.00                                                     |         |
| Nicolay et al. (2011)         | OutB                    | IE                   | Hotel         | Food?                          | GGII      | GGII.4 2006  | Diners & food handlers | 2009             | 1               | 28                         | 1                      | 27                                     | 0.04                                                     | [2]     |
| Boxman et al. (2009)          | OutB+                   | NL                   | Restaurant    | Food                           | GGI       | GGI.6        | Diners & food handlers | 2007             | 1               | 21                         | 7                      | 14                                     | 0.33                                                     |         |
| Kuo et al. (2009)             | OutB                    | AT                   | Restaurant    | Food                           | GGII      | (---)        | Diners & kitchen staff | 2007             | 1               | 21                         | 2                      | 19                                     | 0.10                                                     |         |
| Makary et al. (2009)          | OutB                    | FI                   | Canteen (n=3) | Food                           | GGII      | GGII.1       | Employees, cooks       | 2006             | 3               | 114                        | 3                      | 111                                    | 0.03                                                     |         |
| Schimmelpfennig et al. (2009) | OutB                    | DE                   | Restaurant    | Food                           | (---)     | (---)        | Diners & kitchen staff | 2007             | 1               | 53                         | 1                      | 52                                     | 0.02                                                     |         |
| Boraja (2008)                 | OutB                    | DE                   | Restaurant    | (---)                          | (---)     | (---)        | Diners                 | 2007             | 1               | 20                         | 0                      | 20                                     | 0.00                                                     |         |
| Sinn (2008)                   | OutB                    | DE                   | Restaurant    | EC, p2p, food(?)               | GGII      | GGII.4 2006b | Diners & kitchen staff | 2006             | 1               | 23                         | 2                      | 21                                     | 0.09                                                     |         |
| Fell et al. (2007)            | OutB                    | DE                   | Canteen       | Food                           | GGI       | (---)        | Diners & kitchen staff | 2005             | 1               | 70                         | 1                      | 69                                     | 0.01                                                     |         |



| Authors/year of publ.   | Study type <sub>1</sub> | Country <sub>2</sub> | Setting    | Transmission path <sub>3</sub> | Genogroup | Genotype             | Collectives infected          | Outbreak year(s) | Outbreak(s) [n] | Subjects with symptoms [n] | Employees affected [n] | Subjects (non-staff with symptoms) [n] | Ratio symptomatic employees: symptomatic persons (total) | Remarks |
|-------------------------|-------------------------|----------------------|------------|--------------------------------|-----------|----------------------|-------------------------------|------------------|-----------------|----------------------------|------------------------|----------------------------------------|----------------------------------------------------------|---------|
| Michel et al. (2007)    | OutB                    | IE                   | Hotel      | p2p                            | (---)     | (---)                | Diners & cooks                | 2006             | 1               | 98                         | 11                     | 87                                     | 0.11                                                     |         |
| Showell et al. (2007)   | OutB                    | GB                   | Canteen    | Food                           | GGII      | GGII.4 v2, GGII.4 v3 | Diners & food handlers        | 2007             | 1               | 36                         | 0                      | 36                                     | 0.00                                                     |         |
| Wit de et al. (2007)    | OutB                    | NL                   | Restaurant | Food                           | GGII      | (---)                | Diners & cooks                | 2001             | 1               | 249                        | 18                     | 231                                    | 0.07                                                     |         |
| Johansson et al. (2002) | OutB                    | SE                   | Hotel      | Food, p2p, EC                  | GGI       | GGI.3 Desert Shield  | Hotel guests & hotel staff    | 2000             | 1               | 201                        | 9                      | 192                                    | 0.04                                                     |         |
| O'Neill et al. (2001)   | OutB+                   | GB                   | Hotel      | (---)                          | (---)     | (---)                | Hotel guests & hotel staff    | 1998             | 1               | 186                        | 14                     | 172                                    | 0.08                                                     |         |
|                         |                         |                      | Hotel      | (---)                          | (---)     | (---)                | Hotel guests & catering staff | 1999             | 1               | 23                         | 3                      | 20                                     | 0.13                                                     |         |
|                         |                         |                      | Hotel      | (---)                          | (---)     | (---)                | Hotel guests                  | 2000             | 1               | 485                        | 0                      | 485                                    | 0.00                                                     |         |
|                         |                         |                      | Restaurant | (---)                          | (---)     | (---)                | Diners & cooks                | 1999             | 1               | 7                          | 1                      | 6                                      | 0.14                                                     |         |

Legend: <sup>1-4</sup> see supplementary table 1;

[1] Only stool samples submitted by kitchen workers (without symptoms?) and relatives thereof;

[2] also asymptomatic persons tested for NoV



Online Resource 4: Epidemiological data for NoV outbreaks in other settings associated with food handling

| Authors/year of publ.        | Study type <sub>1</sub> | Country <sub>2</sub> | Setting               | Transmission path <sub>3</sub> | Genogroup            | Genotype                            | Collectives infected                | Outbreak year(s) | Outbreak(s) [n] | Subjects with symptoms [n] | Employees affected [n] | Subjects (non-staff with symptoms) [n] | Ratio symptomatic employees: symptomatic persons (total) | Remarks |
|------------------------------|-------------------------|----------------------|-----------------------|--------------------------------|----------------------|-------------------------------------|-------------------------------------|------------------|-----------------|----------------------------|------------------------|----------------------------------------|----------------------------------------------------------|---------|
| Einöder-Moreno et al. (2016) | OutB                    | NO                   | Conference centre     | Food                           | GGI                  | GGI.2 Southhampton                  | Meeting participants, kitchen staff | 2013             | 1               | 76                         | 2                      | 74                                     | 0.03                                                     |         |
| Mayet et al. (2011)          | OutB                    | FR                   | Military camp         | Food                           | GGI                  | (---) <sub>4</sub>                  | Military personnel, cook            | 2011             | 1               | 148                        | 1                      | 147                                    | 0.01                                                     |         |
| Wadl et al. (2010)           | OutB                    | DE                   | Military base         | Food, p2p, EC                  | GGII                 | GGII.4 2006b                        | Military personnel, kitchen staff   | 2009             | 1               | 28                         | 1                      | 27                                     | 0.04                                                     | [1]     |
| Zomer et al. (2010)          | OutB                    | SE                   | Manufacturing company | Food                           | GGI                  | GGI.3 Desert Shield                 | Employees, food handlers            | 2007             | 1               | 308                        | 2                      | 306                                    | 0.01                                                     |         |
|                              | OutB+                   | DE                   | Company excursion     | Food                           | GGII                 | GGII.2 Melksham-like                | Excursion participants              | 2006             | 1               | 73                         | 0                      | 73                                     | 0.00                                                     | [2]     |
| Seminar                      |                         |                      | Food                  | GGII                           | GGII.2 Melksham-like | Seminar participants                | 1                                   |                  | 21              | 0                          | 21                     | 0.00                                   |                                                          |         |
| Social gathering             |                         |                      | Food                  | (---)                          | (---)                | Social gathering participants       | 1                                   |                  | 45              | 0                          | 45                     | 0.00                                   |                                                          |         |
| Zühl (2006)                  | OutB                    | DE                   | Broadcasting center   | (---)                          | (---)                | (---)                               | Employees, security staff           | 2006             | 1               | 47                         | 0                      | 47                                     | 0.00                                                     |         |
| Fretz et al. (2005)          | OutB+                   | CH                   | Municipality (n=2)    | Water                          | GGI, GGII            | GGI.2 White Rose, GGII.4 Camberwell | Inhabitants                         | 2001             | 1               | >650                       | 0                      | >650                                   | 0.00                                                     |         |

| Authors/year of publ. | Study type <sup>1</sup> | Country <sup>2</sup> | Setting          | Transmission path <sup>3</sup> | Genogroup | Genotype    | Collectives infected | Outbreak year(s) | Outbreak(s) [n] | Subjects with symptoms [n] | Employees affected [n] | Subjects (non-staff with symptoms) [n] | Ratio symptomatic employees: symptomatic persons (total) | Remarks |
|-----------------------|-------------------------|----------------------|------------------|--------------------------------|-----------|-------------|----------------------|------------------|-----------------|----------------------------|------------------------|----------------------------------------|----------------------------------------------------------|---------|
|                       |                         |                      | Ski camp (n=3)   | Food, EC                       | (---)     | (---)       | Skiers               |                  | 3               | 63                         | 0                      | 63                                     | 0.00                                                     |         |
|                       |                         |                      | Social gathering | (---)                          | GGI       | GGI.4 Chiba | Family members       |                  | 1               | 20                         | 0                      | 20                                     | 0.00                                                     |         |

Legend

<sup>1-4</sup> see supplementary table 1

[1] the symptomatic staff member reported only nausea; [2] all three NoV outbreaks are linked to the same food handler

## References

- Adams B (2008) [On multiple norovirus outbreaks in the district of Olpe]. Zu mehreren Norovirus-Ausbrüchen im Kreis Olpe *Epidemiologisches Bulletin* 6:48–49
- Aziz A-M (2010) Managing outbreaks of norovirus in an NHS hospital *Brit J Nurs* 19:589–596
- Baker K, Morris J, McCarthy N, Saldana L, Lowther J, Collinson A, Young M (2011) An outbreak of norovirus infection linked to oyster consumption at a UK restaurant, February 2010 *J Public Health (Oxf)* 33:205–211
- Baum von H, Kochs M, Gonser T (2004) [On an outbreak of norovirus-related diseases in a hospital]. Zu einem Ausbruch Norovirus-bedingter Erkrankungen in einem Klinikum *Epidemiologisches Bulletin* 36:302
- Billgren M, Christenson B, Hedlund KO, Vinjé J (2002) Epidemiology of Norwalk-like Human Caliciviruses in Hospital Outbreaks of Acute Gastroenteritis in the Stockholm Area in 1996 *J Infect* 44:26–32
- Boraja G (2008) [On a norovirus outbreak during a school trip]. Zu einem Norovirus-Ausbruch während einer Klassenfahrt *Epidemiologisches Bulletin* 6:48
- Boxman I, Dijkman R, Verhoef L, Maat A, Dijk van G, Vennema H, Koopmans M (2009) Norovirus on Swabs Taken from Hands Illustrate Route of Transmission: A Case Study *J Food Prot* 72:1753–1755
- Brey R (2016) [Norovirus outbreak in the district of Amberg-Sulzbach, Bavaria, September 2016]. Norovirus-Ausbruch im Landkreis Amberg-Sulzbach, Bayern, September 2016 *Epidemiologisches Bulletin* 48:531–534
- Carpentier M et al. (2011) Investigation and Control of a Nosocomial Norovirus Outbreak in a Long-Term Care Facility *Infect Control Hosp Epidemiol* 32:1052–1055
- Cummins M, Ready D (2016) Role of the Hospital Environment in Norovirus Containment *J Infect Dis* 213:12–14
- Cunney RJ et al. (2000) Investigation of an outbreak of gastroenteritis caused by Norwalk-like virus, using solid phase immune electron microscopy *J Hosp Infect* 44:113–118
- Danial J et al. (2016) Lessons learned from a prolonged and costly norovirus outbreak at a Scottish medicine of the elderly hospital: case study *J Hosp Infect* 93:127–134
- Danial J, Cepeda JA, Cameron F, Cloy K, Wishart D, Templeton KE (2011) Epidemiology and costs associated with norovirus outbreaks in NHS Lothian, Scotland 2007–2009 *J Hosp Infect* 79:354–358
- Dreier J, Störmer M, Mäde D, Burkhardt S, Kleesiek K (2006) Enhanced Reverse Transcription-PCR Assay for Detection of Norovirus Genogroup I *J Clin Microbiol* 44:2714–2720
- Einöder-Moreno M, Lange H, Grepp M, Osborg E, Vainio K, Vold L (2016) Non-heat-treated frozen raspberries the most likely vehicle of a norovirus outbreak in Oslo, Norway, November 2013 *Epidemiol Infect* 144:2765–2772
- Fell G, Boyens M, Baumgarte S (2007) [Frozen berries as a risk factor for outbreaks of norovirus gastroenteritis. Results of an outbreak investigation in the summer of 2005 in Hamburg]. Tiefkühlfrüchte als Risikofaktor für Gastroenteritis-Ausbrüche durch Noroviren *Bundesgesundheitsbla* 50:230–236
- Fretz R et al. (2009) An outbreak of norovirus gastroenteritis in an Austrian hospital, winter 2006–2007 *Wien Klin Wochenschr* 121:137–143
- Fretz R, Svoboda P, Lüthi TM, Tanner M, Baumgartner A (2005) Outbreaks of gastroenteritis due to infections with Norovirus in Switzerland, 2001–2003 *Epidemiol Infect* 133:429–437
- Friesema IHM et al. (2009) Differences in clinical presentation between norovirus genotypes in nursing homes *J Clin Virol* 46:341–344

- Gallimore CI, Cubitt D, du Plessis N, Gray JJ (2004) Asymptomatic and Symptomatic Excretion of Noroviruses during a Hospital Outbreak of Gastroenteritis *J Clin Microbiol* 42:2271–2274
- Guzman-Herrador B, Heier BT, Osborg EJ, Nguyen VH, Vold L (2011) Outbreak of norovirus infection in a hotel in Oslo, Norway, January 2011 *Euro Surveill* 16:19928
- Harris JP (2016) Norovirus Surveillance: An Epidemiological Perspective *J Infect Dis* 213:S8–S11
- Hauri AM, Westbrock H-J, Claus H, Geis S, Giernat S, Forßbohm M, Uphoff H (2011) Electronic Outbreak Surveillance in Germany: A First Evaluation for Nosocomial Norovirus Outbreaks *PLOS ONE* 6:e17341
- Heijne JCM et al. (2012) Quantifying Transmission of Norovirus During an Outbreak *Epidemiology* 23:277–284
- Illingworth E, Taborn E, Fielding D, Cheesbrough J, Diggle PJ, Orr D (2011) Is closure of entire wards necessary to control norovirus outbreaks in hospital? Comparing the effectiveness of two infection control strategies *J Hosp Infect* 79:32–37
- Jansen A et al. (2004) [Outbreak of Norovirus in Berlin - Epidemiological and Clinical Features and Prevention]. *Die Norovirus-Epidemie in Berlin - Klinik, Epidemiologie und Prävention Z Gastroenterol* 42:311–316
- Jian S-W, Simons E, Lederer I, Hoehne M, Offner E, Allerberger F, Schmid D (2012) A foodborne outbreak due to norovirus in a vocational school, Austria November 2011 *Wien Tierarztl Monatsschr* 99:24–29
- Johansson PJH, Torvén M, Hammarlund A-C, Björne U, Hedlund K-O, Svensson L (2002) Food-Borne Outbreak of Gastroenteritis Associated with Genogroup I Calicivirus *J Clin Microbiol* 40:794–798
- Kanerva M, Maunula L, Lappalainen M, Mannonen L, von Bonsdorff CH, Anttila VJ (2009) Prolonged norovirus outbreak in a Finnish tertiary care hospital caused by GII.4-2006b subvariants *J Hosp Infect* 71:206–213
- Kaynak S, Pohl S, Kubasch S (2007) [On a norovirus outbreak in a nursing home]. *Zu einem Norovirus-Ausbruch in einem Pflegeheim Epidemiologisches Bulletin* 9:71–72
- Khanna N, Goldenberger D, Graber P, Battegay M, Widmer AF (2003) Gastroenteritis outbreak with norovirus in a Swiss university hospital with a newly identified virus strain *J Hosp Infect* 55:131–136
- Kuo H-W, Schmid D, Jelovcan S, Pichler A-M, Magnet E, Reichart S, Allerberger F (2009) A Foodborne Outbreak Due to Norovirus in Austria, 2007 *J Food Prot* 72:193–196
- Kuusi M, Nuorti JP, Maunula L, Tran Minh NN, Ratia M, Karlsson J, Von Bonsdorff CH (2002) A prolonged outbreak of Norwalk-like calicivirus (NLV) gastroenteritis in a rehabilitation centre due to environmental contamination *Epidemiol Infect* 129:133–138
- Leuenberger S, Widdowson M-A, Feilchenfeldt J, Egger R, Streuli RA (2007) Norovirus outbreak in a district general hospital - new strain identified *Swiss Med Wkly* 137:57–61
- Lopman BA et al. (2004) Epidemiology and Cost of Nosocomial Gastroenteritis, Avon, England, 2002–2003 *Emerging Infect Dis* 10:1827–1834
- Loury P, Le Guyader FS, Le Saux JC, Ambert-Balay K, Parrot P, Hubert B (2015) A norovirus oyster-related outbreak in a nursing home in France, January 2012 *Epidemiol Infect* 143:2486–2493
- Makary P et al. (2009) Multiple norovirus outbreaks among workplace canteen users in Finland, July 2006 *Epidemiol Infect* 137:402–407
- Maritschnik S et al. (2013) A Food Handler-Associated, Foodborne Norovirus GII.4 Sydney 2012-Outbreak Following a Wedding Dinner, Austria, October 2012 *Food Environ Virol* 5:220–225
- Mattner F, Guyot A, Henke-Gendo C (2015) Analysis of norovirus outbreaks reveals the need for timely and extended microbiological testing *J Hosp Infect* 91:332–337

- Mattner F, Sohr D, Heim A, Gastmeier P, Vennema H, Koopmans M (2006) Risk groups for clinical complications of norovirus infections: an outbreak investigation *Clin Microbiol Infect* 12:69–74
- Mayet A et al. (2011) Food-borne outbreak of norovirus infection in a French military parachuting unit, April 2011 *Euro Surveill* 16:19930
- Meyer E, Ebner W, Scholz R, Dettenkofer M, Daschner FD (2004) Nosocomial outbreak of norovirus gastroenteritis and investigation of ABO histo-blood group type in infected staff and patients *J Hosp Infect* 56:64–66
- Michel A, Fitzgerald R, Whyte D, Fitzgerald A, Beggan E, O’Connell N, Greally T (2007) Norovirus outbreak associated with a hotel in the west of Ireland, 2006 *Euro Surveill* 12:19931
- Mitchell C, Meredith P, Richardson M, Greengross P, Smith GB (2015) Reducing the number and impact of outbreaks of nosocomial viral gastroenteritis: time-series analysis of a multidimensional quality improvement initiative *BMJ Qual Saf* 6:466–474
- Nicolay N et al. (2011) Potential role of asymptomatic kitchen food handlers during a food-borne outbreak of norovirus infection, Dublin, Ireland, March 2009 *Euro Surveill* 16:19931
- O’Neill HJ, McCaughey C, Wyatt DE, Mitchell F, Coyle PV (2001) Gastroenteritis outbreaks associated with Norwalk-like viruses and their investigation by nested RT-PCR *BMC Microbiol* 1:1–14
- Odelin MF et al. (2005) Investigation d’une épidémie de gastro-entérite à norovirus dans un hôpital gériatrique *Ann Biol Clin (Paris)* 64:141–147
- Oppermann H, Mueller B, Takkinen J, Klauditz W, Schreier E, Ammon A (2001) An outbreak of viral gastroenteritis in a mother-and-child health clinic *Int J Hyg Environ Health* 203:369–373
- Rahamat-Langendoen JC, Lokate M, Schölvinck EH, Friedrich AW, Niesters HGM (2013) Rapid detection of a norovirus pseudo-outbreak by using real-time sequence based information *J Clin Virol* 58:245–248
- Sauvan V, Rameau YR, Pagani L, Pittet D, Harbarth S (2013) P238: Surveillance in geriatrics: what for? Which indicators? *Antimicrob Resist Infect Control* 2:P238
- Schimmelpfennig M, Walter-Dohmes M, Aue T, Kassel G, Uphoff H, Fitzenberger J, Hauri AM (2009) [Noroviruses: on a foodborne outbreak among customers of a public canteen]. *Noroviren: Zu einem lebensmittelbedingten Ausbruch unter Besuchern einer öffentlichen Kantine* *Epidemiologisches Bulletin* 9:80–81
- Schmid D et al. (2011) Foodborne gastroenteritis outbreak in an Austrian healthcare facility caused by asymptomatic, norovirus-excreting kitchen staff *J Hosp Infect* 77:237–241
- Schmid D, Lederer I, Pichler A-M, Berghold C, Schreier E, Allerberger F (2005) An outbreak of Norovirus infection affecting an Austrian nursing home and a hospital *Wien Klin Wochenschr* 117:802–808
- Schulz-Stübner S, Reska M, Hauer T, Schaumann R (2016) [First Results of the German consulting center for infection control outbreak registry]. *Infektionen und Kolonisationen: Was können wir verbessern? Erste Ergebnisse aus dem Ausbruchsregister beim Deutschen Beratungszentrum für Hygiene Dtsch Med Wochenschr* 141:e47–e52
- Schwartz S et al. (2011) Norovirus gastroenteritis causes severe and lethal complications after chemotherapy and hematopoietic stem cell transplantation *Blood* 117:5850–5856
- Showell D, Sundkvist T, Reacher M, Gray J (2007) Norovirus outbreak associated with canteen salad in Suffolk, United Kingdom *Euro Surveill* 12:3323
- Simon A et al. (2006) Norovirus outbreak in a pediatric oncology unit *Scand J Gastroenterol* 41:693–699
- Sinn G (2008) [On a norovirus outbreak after a restaurant visit]. *Zu einem Norovirus-Ausbruch nach einem Restaurantbesuch* *Epidemiologisches Bulletin* 6:46–47

- Smith AJ et al. (2012) A large foodborne outbreak of norovirus in diners at a restaurant in England between January and February 2009 *Epidemiol Infect* 140:1695–1701
- Sommer C, Mueller W, Resch B (2009) Two nosocomial norovirus outbreaks in the neonatal intensive and intermediate care unit *Eur J Clin Microbiol Infect Dis* 28:1133–1136
- Sukhrie FHA, Teunis P, Vennema H, Copra C, Thijs Beersma MFC, Bogerman J, Koopmans M (2012) Nosocomial Transmission of Norovirus Is Mainly Caused by Symptomatic Cases *Clin Infect Dis* 54:931–937
- Teunis PFM, Sukhrie FHA, Vennema H, Bogerman J, Beersma MFC, Koopmans MPG (2015) Shedding of norovirus in symptomatic and asymptomatic infections *Epidem Infect* 143:1710-1717
- Vardy J, Love AJ, Dignon N (2007) Outbreak of acute gastroenteritis among emergency department staff *Emerg Med J* 24:699–702
- Verbelen V et al. (2004) Hospital outbreak of gastroenteritis due to Norovirus in Belgium *Acta Clin Belg* 59:30–33
- Vivancos R, Sundkvist T, Barker D, Burton J, Nair P (2010) Effect of exclusion policy on the control of outbreaks of suspected viral gastroenteritis: Analysis of outbreak investigations in care homes *Am J Infect Control* 38:139–143
- Vo TH et al. (2016) An Outbreak of Norovirus Infections Among Lunch Customers at a Restaurant, Tampere, Finland, 2015 *Food Environ Virol* 8:174–179 Wadl M et al. (2010) Food-borne norovirus-outbreak at a military base, Germany, 2009 *BMC Infect Dis* 10:30
- Wit de MAS, Widdowson MA, Vennema H, de Bruin E, Fernandes T, Koopmans M (2007) Large outbreak of norovirus: The baker who should have known better *J Infect* 55:188–193
- Zingg W, Colombo C, Jucker T, Bossart W, Ruef C (2005) Impact of an Outbreak of Norovirus Infection on Hospital Resources *Infect Control Hosp Epidemiol* 26:263–267
- Zomer TP et al. (2010) A foodborne norovirus outbreak at a manufacturing company *Epidemiol Infect* 138:501–506
- Zühl J (2006) [Enhanced infection surveillance during the football world cup]. *Erweiterte Infektionssurveillance im Rahmen der Fußballweltmeisterschaft (2)* *Epidemiologisches Bulletin* 25:195
